# Supplementary material for: Ovarian reserve parameters and IVF outcomes in 510 women with poor ovarian response (POR) treated with intraovarian injection of autologous platelet rich plasma (PRP)
Source: Aging (Albany NY). 2022 Mar 22;14(6):2513–23. doi: 10.18632/aging.203972 (PMC9004561; doi:10.18632/aging.203972)
Supplement: Supplementary Tables [file aging-14-203972-s001.pdf]

## SUPPLEMENTARY TABLES

**Supplementary Table 1. Characteristics of 22 women who had spontaneous pregnancy following PRP injection (mean  $\pm$  SD) (range).**

|                                                         | mean $\pm$ SD (range)        |
|---------------------------------------------------------|------------------------------|
| Age                                                     | 39.1 $\pm$ 4.4 (30-46)       |
| Duration of infertility (years)                         | 4.6 $\pm$ 3.3 (1-13)         |
| Prior IVF attempts                                      | 1.7 $\pm$ 2.1 (0-8)          |
| Number of menstrual cycles pregnancy achieved after PRP | 2.0 $\pm$ 1.4 (1-7)          |
| FSH (mIU/mL) prior to PRP                               | 19.6 $\pm$ 23.9. (2.5-117.0) |
| AMH (ng/ml) prior to PRP                                | 0.36 $\pm$ 0.27 (0.01-1.10)  |
| AFC prior to PRP                                        | 2.8 $\pm$ 1.2 (1-4)          |

**Supplementary Table 2. Clinical and IVF outcome parameters of women with POR who underwent intraovarian autologous PRP injection (mean  $\pm$  SD).**

|                                                                                                  | mean $\pm$ SD (range) |
|--------------------------------------------------------------------------------------------------|-----------------------|
| Patient Age (all women, n=510)                                                                   | 40.3 $\pm$ 4.0        |
| Partner Age (all men, n=510)                                                                     | 41.4 $\pm$ 6.4        |
| BMI (kg/m <sup>2</sup> )                                                                         | 25.7 $\pm$ 5.1        |
| Duration of infertility (years)                                                                  | 7.4 $\pm$ 6.0         |
| Number of previous IVF trials                                                                    | 2.8 $\pm$ 2.9         |
| Days of stimulation (in women who underwent ovarian stimulation; n=474)                          | 8.5 $\pm$ 2.7         |
| Total gonadotropin dose (IU) (in women who underwent controlled ovarian hyperstimulation; n=474) | 3820 $\pm$ 1213       |
| E2 level (pg/ml) on the day of hCG (in women who underwent retrieval; n=427)                     | 646 $\pm$ 542         |
